# Supplementary material
Source: Research Square preprint supplement (doi:10.21203/rs.3.rs-9514584/v1)
Supplement: Supplementary file 1 [file f3762cf7938b94b3eff633f4.docx]

*Data Supplement for Barnes-Scheufler et al.,* History of Psychosis Matters: Deviation in Age-related Decline of Working Memory Across the Schizo-bipolar Spectrum

# Methods:

Linear regression simple model

We first examined simple models including only age, psychosis, and their interaction, then added premorbid IQ and gender as covariates to assess the robustness of our findings, as these variables differed between groups and have been associated with cognitive performance in prior literature.

Model assumptions were verified through visual inspection of QQ-plots (confirming approximately normal distribution of residuals), Levene's tests for homoscedasticity (AC: *p* = 0.085; WMC: *p* = 0.132), and generalized variance inflation factors to assess multicollinearity (all GVIF^(1/(2*Df)) < 1.1). To quantify effect sizes, we calculated partial eta-squared (η²) and Cohen's f for each predictor.

Young adult subgroup analysis

To examine cognitive performance in early adulthood, we conducted independent samples t-tests comparing HPS+ and HPS− participants aged 20–31 years on both ACE-WM and WMC tasks. This age range was selected to capture individuals early in the typical age of illness onset while maintaining adequate sample size. Welch's correction for unequal variances was applied when Levene's test indicated heterogeneity of variance (*p* < .05). Effect sizes were calculated using Cohen's d with 95% confidence intervals.

Illness duration effects

Within the HPS+ group (n = 90), we examined whether illness duration (M = 11.7, SD = 10.2, range 0.5–43.0) predicted cognitive performance using multiple linear regression. Separate models were constructed for ACE-WM and WMC as outcomes, with illness duration as the primary predictor and age as a covariate. Age was included as a covariate given the strong correlation between age and illness duration (r = 0.60, *p* < .001).

Recent onset comparison

To assess whether cognitive deficits are present early in the illness course, we compared HPS+ participants with recent illness onset (illness duration ≤2 years, n = 21) to all HPS− participants (n = 99) on both ACE-WM and WMC tasks. The 2-year threshold was chosen to identify individuals in the early phase of illness while maintaining adequate sample size. Independent samples t-tests with Welch's correction for unequal variances were used. Effect sizes were quantified using Cohen's d with 95% confidence intervals.

# RESULTs:

Linear regression simple model

*ACE-WM task*

The initial regression model examining age, psychosis group, and their interaction was statistically significant, F(3, 185) = 9.71, *p* < .001, with R² = .136 (adjusted R² = .122). Both age (β = -0.014, SE = 0.003, t = -4.43, *p* < .001, 95% CI [-0.020, -0.008], Cohen's f = 0.30, partial η² = .08) and psychosis (β = -0.785, SE = 0.219, t = -3.59, *p* < .001, 95% CI [-1.217, -0.353], Cohen's f = 0.22, partial η² = .05) showed significant main effects. Critically, the age × psychosis interaction was significant (β = 0.015, SE = 0.005, t = 2.85, *p* = .005, 95% CI [0.005, 0.026], Cohen's f = 0.19, partial η² = .03), indicating differential rates of cognitive decline between groups.

*WMC task*

The initial regression model was statistically significant, F(3, 185) = 6.98, *p* < .001, with R² = .102 (adjusted R² = .088), indicating that approximately 9% of variance in working memory capacity was explained by age, psychosis, and their interaction. Both age (β = -0.018, SE = 0.005, t = -3.43, *p* < .001, 95% CI [-0.028, -0.008], Cohen's f = 0.24, partial η² = .06) and psychosis (β = -0.762, SE = 0.359, t = -2.12, *p* = .035, 95% CI [-1.471, -0.054], Cohen's f = 0.19, partial η² = .03) showed significant effects. However, unlike attentional control, the age × psychosis interaction was not significant (β = 0.012, SE = 0.009, t = 1.38, *p* = .169, 95% CI [-0.005, 0.029], Cohen's f = 0.09), indicating similar rates of age-related decline across groups.

| **Group** | **FGA** | **SGA** | **Lithium** | **Valproate** | **Lamotrigine** | **Pregabalin** | **Antidepressants** |
| --- | --- | --- | --- | --- | --- | --- | --- |
| **HCS** | – | – | - | - | - | – | – |
| **PSZ** | 6 | 60 | 3 | 2 | - | 1 | 14 |
| **PBD** | - | 31 | 27 | 9 | 9 | - | 25 |

Table S1. Number of patients receiving the different medications at time of study. FGA = first-generation antipsychotics, SGA = second-generation antipsychotics.
